# Supplementary material for: Synthesis and characterization of tannic acid–PEG hydrogel via Mitsunobu polymerization
Source: Royal Society of Chemistry journal article supplement (doi:10.1039/c9ra09229c), 2020-01-01
Supplement: c9ra09229c3.pdf [file c9ra09229c3.pdf]

# **Supporting Information to “Synthesis and Characterization of Tannic Acid-PEG Hydrogel via Mitsunobu Polymerization**

”

**Chen Chen,<sup>1</sup> Xi-wen Geng,<sup>2</sup> Ya-hui Pan,<sup>1</sup> Yu-ning Ma,<sup>\*,1</sup> Yu-xia Ma,<sup>\*,1</sup>**

**Shu-zhong Gao<sup>1</sup>, and Xiao-jun Huang<sup>3</sup>**

<sup>1</sup>Key Laboratory of New Material Research Institute, Department of  
Acupuncture-Moxibustion and Tuina, Shandong University of Traditional  
Chinese Medicine, Jinan 250355, China

<sup>2</sup>Key Laboratory of Stem Cell and Translational TCM, Experimental center,  
Shandong University of Traditional Chinese Medicine, Jinan 250355, China

<sup>3</sup>MOE Key Laboratory of Macromolecular Synthesis and Functionalization,  
Department of  
Polymer Science and Engineering, Zhejiang University, Hangzhou 310027,  
China

E-mail: myning0405@163.com; myxia1976@163.com

**Table S1** Synthesis of TA-PEG hydrogel: Reagent ratios, ratio of functional groups and results on whether the sample gelled or not.

| Sample   | TA (mmol) | PEG 6000 (mmol) | Pyrogallol groups/hydroxyl groups | Gelation |
|----------|-----------|-----------------|-----------------------------------|----------|
| TA-PEG   | 0.100     | 0.250           | 1.00                              | Y        |
| TA-PEG-1 | 0.100     | 0.500           | 0.50                              | N        |
| TA-PEG-2 | 0.100     | 0.125           | 2.00                              | N        |

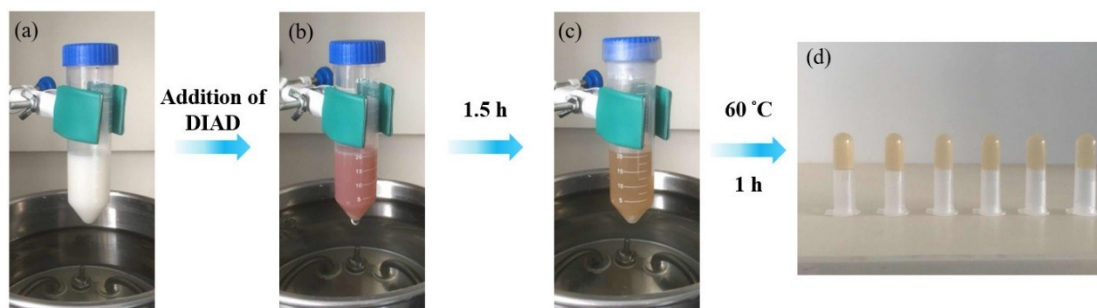

**Figure S1.** The photo pictures of the reaction phenomena for the synthesis of TA-PEG hydrogel. (a) The heterogeneous solution of TA, PEG6000 and  $\text{PPh}_3$  in  $\text{CH}_3\text{CN}$ ; (b) Orange-coloured solution obtained at the end of DIAD titration at

0 °C; (c) The homogeneous solution after constant stirring for 1.5 h; (d) TA-PEG hydrogels.

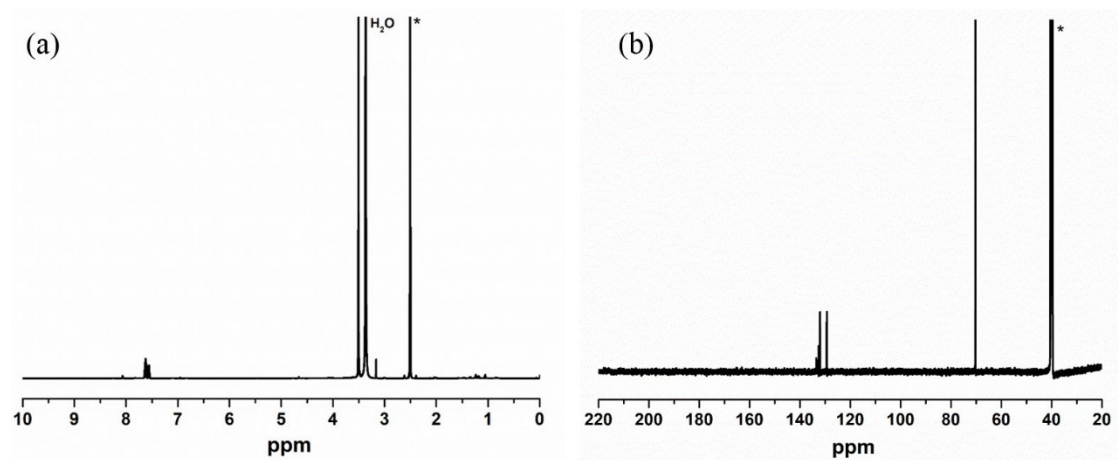

**Figure S2**  $^1\text{H}$  NMR (a) and  $^{13}\text{C}$  NMR (b) results of the hydrolyzed TA-PEG hydrogel after 10 days in 10 mM PBS (pH 7.4) at 37 °C.

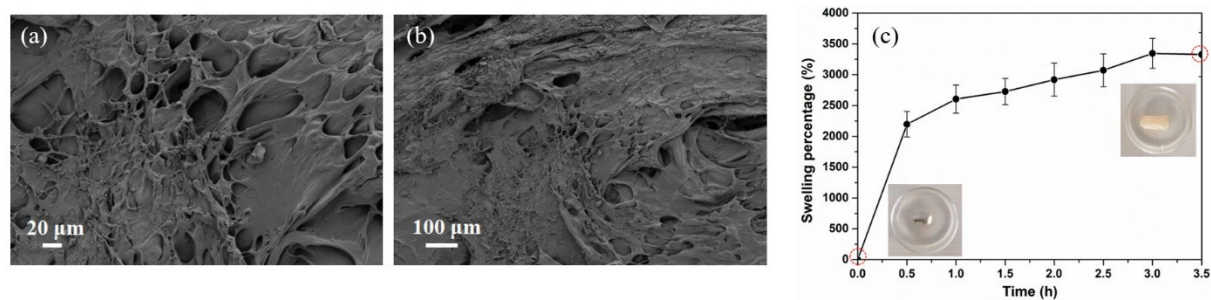

**Figure S3.** Morphology and swelling properties of TA-PEG hydrogel. (a) and (b) Typical FE-SEM micrographs of TA-PEG hydrogel; (c) Swelling percentage of TA-PEG hydrogel.

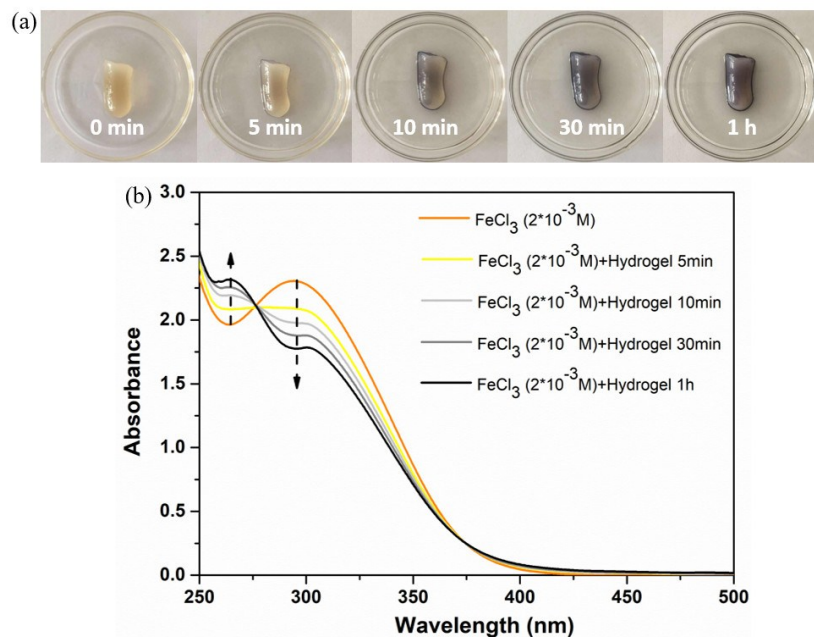

**Figure S4.** The metal-phenol complexation between Fe<sup>III</sup> iron and TA-PEG hydrogel. (a) Photographs of TA-PEG hydrogel in treatment of FeCl<sub>3</sub> (0.002 M); (b) In-situ formation of metal-phenol complexation observed by UV-vis spectrum.

**Table S2.** Antibacterial activity data of TA-PEG hydrogel against *E. coli* and *S. aureus* (\*P<0.05, #P<0.1).

| Sample name            | Inhibition zone(mm) |                  |
|------------------------|---------------------|------------------|
|                        | <i>E. coli</i>      | <i>S. aureus</i> |
| TA-PEG hydrogel        | 18.8*               | 21.7#            |
| Ag NPs@TA-PEG hydrogel | 19.2#               | 20.5#            |
| PVA hydrogel           | 0                   | 0                |

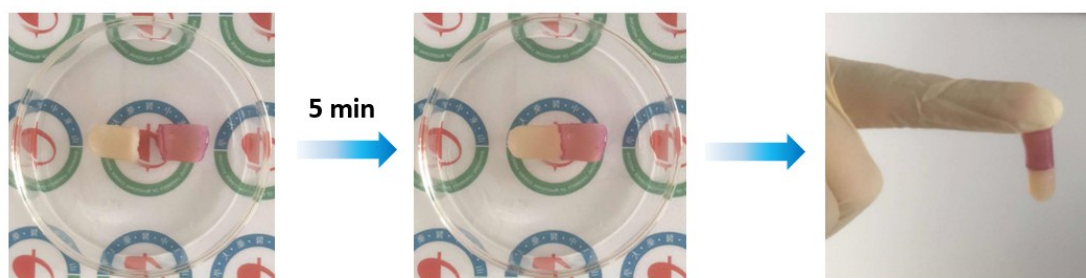

**Figure S5.** Adhesive property of TA-PEG hydrogel (only one piece of the hydrogel was stained by *Eosin Y*).

### Supporting Movies

**Movie S1:** In-situ formation of Ag NPs. The TA-PEG hydrogel were cut into pieces (1 cm in diameter and 3mm in height) and the concentration of  $\text{AgNO}_3$  was 0.1 wt%. The movie is real-time.

**Movie S2:** In-situ formation of Au NPs. The TA-PEG hydrogel were cut into pieces (1 cm in diameter and 3mm in height) and the concentration of  $\text{HAuCl}_4$  was 0.01 wt%. The movie is real-time.
